# Supplementary material
Source: PubMed Central journal article supplement (PMC4787631)
Supplement: crad717769.ww1_default.pdf [file crad717769.ww1_default.pdf]

## **Appendix 1. Physiotherapy programme [posted as supplied by author]**

### **Mobilisation Techniques**

- Thoracic spine:                   1. extension mobilisation or manipulation
- Acromioclavicular joint:       2. anteroposterior (AP) mobilisation  
                                          3. rotation mobilisation
- Glenohumeral:                   4. Superior glenohumeral ligament  
                                          - 30° abduction, lateral rotation (LR), longitudinal caudad mobilisation
5. Inferior glenohumeral ligament  
                                          - 90° abduction, longitudinal caudad mobilisation with varying degrees lateral rotation
6. Posterior capsule  
                                          - AP mobilisation, neutral to 90° abduction, with varying degrees medial rotation (MR)

### **Exercises & Stretches**

#### *Early stage rehabilitation*

1. pendular exercises +/- hand weight to give distraction
2. active assisted range of movement exercises in pain-free range
3. active scapula exercises – all planes of movement
4. middle/lower trapezius exercises. Scapula setting in prone or sitting
5. isometric LR. Varying degrees abduction.
6. active/passive thoracic extension

#### *Middle stage rehabilitation*

7. Weight bearing through hands in standing or 4 point kneeling + scapula pro/retraction
8. Supine or prone. scapula plane LR/MR in 90° abduction
9. Scapular stabilisation programme: Dissociation exercises for elevation/abduction with scapula set
10. Core stability. Transversus abdominis.
11. LR with light weight to end of pain free range. In varying degrees abduction/elevation (30-90°) as pain allows.
12. Elevation with posterior cuff facilitation with theraband
13. Subscapularis hand behind back lift off in prone

#### *Late stage rehabilitation*

14. Theraband LR in neutral, progressed with increasing abduction/elevation
15. Theraband forward punch
16. Proprioceptive neuromuscular pattern exercises
17. Subscapularis hand behind back pushing against wall.

#### *Stretches*

18. levator scapulae
19. posterior capsule
20. anterior capsule; stretches into lateral rotation
21. rhomboids
22. pectoralis minor
23. biceps
